# Supplementary material for: Effectiveness and Safety of Apixaban vs. Warfarin in Venous Thromboembolism Patients with Obesity and Morbid Obesity
Source: MDPI journal article supplement (doi:10.3390/jcm10020200), 2021-01-08
Supplement: s1 [file s1]

**Supplemental Table 1. Post IPTW Descriptive Baseline Characteristics among Overall VTE Patients who Initiated Apixaban vs Warfarin**

|                                            |                                                | Post-IPTW                      |                    | STD <sup>a</sup> |
|--------------------------------------------|------------------------------------------------|--------------------------------|--------------------|------------------|
|                                            |                                                | Warfarin Cohort<br>(Reference) | Apixaban<br>Cohort |                  |
| Sample Size                                |                                                | 94,333                         | 60,786             |                  |
| Age, Mean (SD)                             |                                                | 66.7 (15.9)                    | 66.8 (16.0)        | 0.80             |
| Age Categories, <sup>b</sup> n(%)          |                                                |                                |                    |                  |
|                                            | 18-54                                          | 20,449 (21.7%)                 | 13,098 (21.5%)     | 0.31             |
|                                            | 55-64                                          | 15,430 (16.4%)                 | 9,908 (16.3%)      | 0.15             |
|                                            | 65-74                                          | 26,709 (28.3%)                 | 17,219 (28.3%)     | 0.03             |
|                                            | 75-79                                          | 11,545 (12.2%)                 | 7,471 (12.3%)      | 0.16             |
|                                            | ≥80                                            | 20,200 (21.4%)                 | 13,089 (21.5%)     | 0.29             |
| Gender, n(%)                               |                                                |                                |                    |                  |
|                                            | Male                                           | 42,590 (45.1%)                 | 27,410 (45.1%)     | 0.11             |
|                                            | Female                                         | 51,743 (54.9%)                 | 33,376 (54.9%)     | 0.11             |
| Geographic Region, <sup>c</sup> n(%)       |                                                |                                |                    |                  |
|                                            | Northeast                                      | 14,825 (15.7%)                 | 9,494 (15.6%)      | 0.27             |
|                                            | North Central                                  | 26,271 (27.8%)                 | 16,873 (27.8%)     | 0.20             |
|                                            | South                                          | 35,815 (38.0%)                 | 23,008 (37.9%)     | 0.24             |
|                                            | West                                           | 17,257 (18.3%)                 | 11,301 (18.6%)     | 0.77             |
|                                            | Other                                          | 165 (0.2%)                     | 110 (0.2%)         | 0.16             |
| Index VTE Setting, n(%)                    |                                                |                                |                    |                  |
|                                            | Inpatient                                      | 51,097 (54.2%)                 | 33,030 (54.3%)     | 0.35             |
|                                            | Outpatient                                     | 43,236 (45.8%)                 | 27,756 (45.7%)     | 0.35             |
| Index VTE Event Type, n(%)                 |                                                |                                |                    |                  |
|                                            | DVT only                                       | 53,279 (56.5%)                 | 34,367 (56.5%)     | 0.12             |
|                                            | PE with or without DVT                         | 41,054 (43.5%)                 | 26,419 (43.5%)     | 0.12             |
| Index VTE Etiology, n(%)                   |                                                |                                |                    |                  |
|                                            | Provoked                                       | 53,076 (56.3%)                 | 34,264 (56.4%)     | 0.21             |
|                                            | Unprovoked                                     | 41,257 (43.7%)                 | 26,522 (43.6%)     | 0.21             |
| Deyo-Charlson Comorbidity Index, Mean (SD) |                                                | 2.2 (2.4)                      | 2.2 (2.4)          | 0.71             |
| Baseline Comorbidity, n(%)                 |                                                |                                |                    |                  |
|                                            | Alcohol abuse                                  | 2,987 (3.2%)                   | 1,937 (3.2%)       | 0.12             |
|                                            | Anemia                                         | 27,751 (29.4%)                 | 17,985 (29.6%)     | 0.37             |
|                                            | Central venous Catheter                        | 7,672 (8.1%)                   | 4,977 (8.2%)       | 0.20             |
|                                            | Hematologic disorders associated with bleeding | 7,611 (8.1%)                   | 5,000 (8.2%)       | 0.58             |
|                                            | Ischemic heart/ coronary artery disease        | 23,951 (25.4%)                 | 15,491 (25.5%)     | 0.22             |

|                                                   |                |                |      |
|---------------------------------------------------|----------------|----------------|------|
| Dyspepsia or stomach discomfort                   | 21,551 (22.8%) | 13,960 (23.0%) | 0.28 |
| Hyperlipidemia                                    | 45,444 (48.2%) | 29,333 (48.3%) | 0.16 |
| Obesity                                           | 26,218 (27.8%) | 16,896 (27.8%) | 0.01 |
| Pneumonia                                         | 13,641 (14.5%) | 8,819 (14.5%)  | 0.13 |
| Rheumatologic disease                             | 4,430 (4.7%)   | 2,854 (4.7%)   | 0.01 |
| Sleep apnea                                       | 12,634 (13.4%) | 8,118 (13.4%)  | 0.11 |
| Spinal cord injury                                | 253 (0.3%)     | 168 (0.3%)     | 0.15 |
| Thrombophilia                                     | 3,718 (3.9%)   | 2,420 (4.0%)   | 0.21 |
| Varicose Veins                                    | 3,988 (4.2%)   | 2,560 (4.2%)   | 0.08 |
| Hypertension                                      | 65,067 (69.0%) | 42,014 (69.1%) | 0.31 |
| Non-ESRD Renal Disease                            | 12,837 (13.6%) | 8,297 (13.6%)  | 0.12 |
| End Stage Renal Disease                           | 2,179 (2.3%)   | 1,434 (2.4%)   | 0.33 |
| Inflammatory Bowel Disease                        | 1,769 (1.9%)   | 1,132 (1.9%)   | 0.10 |
| Baseline bleed                                    | 19,481 (20.7%) | 12,611 (20.7%) | 0.24 |
| Recent History of Falls, n(%)                     | 6,853 (7.3%)   | 4,426 (7.3%)   | 0.06 |
| Fracture/trauma involving Lower Extremities, n(%) | 14,515 (15.4%) | 9,346 (15.4%)  | 0.03 |
| Selected Surgeries, n(%)                          | 23,353 (24.8%) | 15,109 (24.9%) | 0.23 |
| Baseline Medication Use, n(%)                     |                |                |      |
| Antiarrhythmic                                    | 9,044 (9.6%)   | 5,841 (9.6%)   | 0.07 |
| Statins                                           | 36,293 (38.5%) | 23,437 (38.6%) | 0.17 |
| Anti-platelets                                    | 7,140 (7.6%)   | 4,613 (7.6%)   | 0.08 |
| Aromatase Inhibitors                              | 207 (0.2%)     | 131 (0.2%)     | 0.06 |
| Beta Blockers                                     | 32,108 (34.0%) | 20,784 (34.2%) | 0.33 |
| Gastroprotective Agents                           | 26,741 (28.3%) | 17,274 (28.4%) | 0.16 |
| SERMS                                             | 567 (0.6%)     | 364 (0.6%)     | 0.04 |
| NSAIDs                                            | 24,770 (26.3%) | 15,951 (26.2%) | 0.04 |
| Hormone Therapy (estrogen)                        | 5,207 (5.5%)   | 3,344 (5.5%)   | 0.08 |

DVT: Deep vein thrombosis; ESRD: End stage renal disease; IPTW: Inverse probability treatment weighting; NSAIDs: Nonsteroidal anti-inflammatory drug; SERMS: Selective estrogen receptor modulator; PE: Pulmonary embolism; SD: Standard deviation; STD: Standardized differences; VTE: Venous thromboembolism

<sup>a</sup> Std Difference=100\*|actual std diff|. Std Difference greater than 10 is considered significant

<sup>b</sup> After applying weights, the values for age category were not whole numbers; therefore, due to rounding the sum of patients does not equal 100%

<sup>c</sup> After applying weights, the values for region category were not whole numbers; therefore, due to rounding the sum of patients does not equal 100%

Note: the following variables were considered in the propensity score model and subsequent weighting: age category, gender, geographic region, type of index encounter (inpatient vs outpatient), VTE diagnosis (DVT vs PE with or without DVT), VTE etiology (provoked vs unprovoked), Deyo Charlson comorbidity

index, baseline comorbidities (all listed tabs), recent history of falls, fracture/trauma involving lower extremities, selected surgeries, and baseline medication use (weighted for specific medications).

**Supplemental Table 2. Pre- and Post-IPTW Descriptive Baseline Characteristics Among VTE Patients with Obesity who Initiated Apixaban vs Warfarin**

|                                      | Pre-IPTW                    |                 |                  | Post-IPTW                   |                 |                  |
|--------------------------------------|-----------------------------|-----------------|------------------|-----------------------------|-----------------|------------------|
|                                      | Warfarin Cohort (Reference) | Apixaban Cohort | STD <sup>a</sup> | Warfarin Cohort (Reference) | Apixaban Cohort | STD <sup>a</sup> |
| Sample Size                          | 25,602                      | 17,493          |                  | 25,602                      | 17,493          |                  |
| Age, Mean (SD)                       | 64.9 (14.1)                 | 63.5 (14.5)     | 9.61             | 64.3 (14.3)                 | 64.5 (14.2)     | 1.41             |
| Age Categories, <sup>b</sup> n(%)    |                             |                 |                  |                             |                 |                  |
| 18-54                                | 5,702 (22.3%)               | 4,545 (26.0%)   | 8.68             | 6,074 (23.7%)               | 4,130 (23.6%)   | 0.27             |
| 55-64                                | 4,276 (16.7%)               | 3,576 (20.4%)   | 9.63             | 4,635 (18.1%)               | 3,155 (18.0%)   | 0.18             |
| 65-74                                | 9,358 (36.6%)               | 5,402 (30.9%)   | 12.02            | 8,781 (34.3%)               | 6,008 (34.3%)   | 0.10             |
| 75-79                                | 3,120 (12.2%)               | 1,957 (11.2%)   | 3.11             | 3,034 (11.9%)               | 2,089 (11.9%)   | 0.27             |
| ≥80                                  | 3,146 (12.3%)               | 2,013 (11.5%)   | 2.41             | 3,078 (12.0%)               | 2,112 (12.1%)   | 0.15             |
| Gender, n(%)                         |                             |                 |                  |                             |                 |                  |
| Male                                 | 10,120 (39.5%)              | 7,581 (43.3%)   | 7.74             | 10,504 (41.0%)              | 7,167 (41.0%)   | 0.12             |
| Female                               | 15,482 (60.5%)              | 9,912 (56.7%)   | 7.74             | 15,098 (59.0%)              | 10,326 (59.0%)  | 0.12             |
| Geographic Region, <sup>c</sup> n(%) |                             |                 |                  |                             |                 |                  |
| Northeast                            | 4,059 (15.9%)               | 2,463 (14.1%)   | 4.97             | 3,869 (15.1%)               | 2,626 (15.0%)   | 0.28             |
| North Central                        | 8,088 (31.6%)               | 3,845 (22.0%)   | 21.83            | 7,094 (27.7%)               | 4,831 (27.6%)   | 0.20             |
| South                                | 8,829 (34.5%)               | 9,162 (52.4%)   | 36.69            | 10,667 (41.7%)              | 7,275 (41.6%)   | 0.15             |
| West                                 | 4,584 (17.9%)               | 2,011 (11.5%)   | 18.17            | 3,940 (15.4%)               | 2,737 (15.6%)   | 0.71             |
| Other                                | 42 (0.2%)                   | 12 (0.1%)       | 2.80             | 32 (0.1%)                   | 23 (0.1%)       | 0.19             |
| Index VTE Setting, n(%)              |                             |                 |                  |                             |                 |                  |
| Inpatient                            | 17,155 (67.0%)              | 10,602 (60.6%)  | 13.35            | 16,530 (64.6%)              | 11,321 (64.7%)  | 0.32             |
| Outpatient                           | 8,447 (33.0%)               | 6,891 (39.4%)   | 13.35            | 9,072 (35.4%)               | 6,172 (35.3%)   | 0.32             |
| Index VTE Event Type, n(%)           |                             |                 |                  |                             |                 |                  |
| DVT only                             | 12,183 (47.6%)              | 8,378 (47.9%)   | 0.62             | 12,214 (47.7%)              | 8,359 (47.8%)   | 0.16             |
| PE with or without DVT               | 13,419 (52.4%)              | 9,115 (52.1%)   | 0.62             | 13,388 (52.3%)              | 9,134 (52.2%)   | 0.16             |
| Index VTE Etiology, n(%)             |                             |                 |                  |                             |                 |                  |
| Provoked                             | 17,000 (66.4%)              | 10,415 (59.5%)  | 14.25            | 16,298 (63.7%)              | 11,146 (63.7%)  | 0.13             |
| Unprovoked                           | 8,602 (33.6%)               | 7,078 (40.5%)   | 14.25            | 9,304 (36.3%)               | 6,347 (36.3%)   | 0.13             |

|                                                   |                |                |       |                |                |      |
|---------------------------------------------------|----------------|----------------|-------|----------------|----------------|------|
| Deyo-Charlson Comorbidity Index, Mean (SD)        | 2.8 (2.6)      | 2.5 (2.5)      | 10.11 | 2.7 (2.6)      | 2.7 (2.6)      | 0.53 |
| Baseline Comorbidity, n(%)                        |                |                |       |                |                |      |
| Alcohol abuse                                     | 684 (2.7%)     | 456 (2.6%)     | 0.40  | 684 (2.7%)     | 475 (2.7%)     | 0.26 |
| Anemia                                            | 8,958 (35.0%)  | 5,164 (29.5%)  | 11.72 | 8,405 (32.8%)  | 5,765 (33.0%)  | 0.27 |
| Central venous Catheter                           | 3,033 (11.8%)  | 1,604 (9.2%)   | 8.74  | 2,772 (10.8%)  | 1,909 (10.9%)  | 0.28 |
| Hematologic disorders associated with bleeding    | 2,521 (9.8%)   | 1,288 (7.4%)   | 8.87  | 2,270 (8.9%)   | 1,564 (8.9%)   | 0.25 |
| Ischemic heart/ coronary artery disease           | 7,599 (29.7%)  | 5,037 (28.8%)  | 1.95  | 7,551 (29.5%)  | 5,189 (29.7%)  | 0.37 |
| Dyspepsia or stomach discomfort                   | 6,608 (25.8%)  | 4,373 (25.0%)  | 1.87  | 6,549 (25.6%)  | 4,508 (25.8%)  | 0.43 |
| Hyperlipidemia                                    | 14,732 (57.5%) | 9,918 (56.7%)  | 1.71  | 14,683 (57.3%) | 10,048 (57.4%) | 0.19 |
| Pneumonia                                         | 3,955 (15.4%)  | 2,639 (15.1%)  | 1.01  | 3,930 (15.4%)  | 2,681 (15.3%)  | 0.07 |
| Rheumatologic disease                             | 1,332 (5.2%)   | 845 (4.8%)     | 1.71  | 1,297 (5.1%)   | 891 (5.1%)     | 0.14 |
| Sleep apnea                                       | 7,448 (29.1%)  | 4,745 (27.1%)  | 4.38  | 7,239 (28.3%)  | 4,932 (28.2%)  | 0.18 |
| Spinal cord injury                                | 67 (0.3%)      | 47 (0.3%)      | 0.14  | 67 (0.3%)      | 44 (0.3%)      | 0.21 |
| Thrombophilia                                     | 1,180 (4.6%)   | 696 (4.0%)     | 3.11  | 1,125 (4.4%)   | 784 (4.5%)     | 0.42 |
| Varicose Veins                                    | 1,267 (4.9%)   | 947 (5.4%)     | 2.10  | 1,310 (5.1%)   | 896 (5.1%)     | 0.03 |
| Hypertension                                      | 20,774 (81.1%) | 13,738 (78.5%) | 6.50  | 20,529 (80.2%) | 14,042 (80.3%) | 0.22 |
| Non-ESRD Renal Disease                            | 4,965 (19.4%)  | 3,080 (17.6%)  | 4.60  | 4,810 (18.8%)  | 3,309 (18.9%)  | 0.33 |
| End Stage Renal Disease                           | 835 (3.3%)     | 293 (1.7%)     | 10.24 | 673 (2.6%)     | 469 (2.7%)     | 0.33 |
| Inflammatory Bowel Disease                        | 447 (1.7%)     | 280 (1.6%)     | 1.13  | 433 (1.7%)     | 291 (1.7%)     | 0.21 |
| Baseline bleed                                    | 6,395 (25.0%)  | 3,444 (19.7%)  | 12.73 | 5,858 (22.9%)  | 4,012 (22.9%)  | 0.13 |
| Recent History of Falls, n(%)                     | 1,670 (6.5%)   | 1,077 (6.2%)   | 1.50  | 1,645 (6.4%)   | 1,127 (6.4%)   | 0.09 |
| Fracture/trauma involving Lower Extremities, n(%) | 3,798 (14.8%)  | 2,682 (15.3%)  | 1.39  | 3,844 (15.0%)  | 2,619 (15.0%)  | 0.12 |
| Selected Surgeries, n(%)                          | 8,225 (32.1%)  | 5,193 (29.7%)  | 5.28  | 8,015 (31.3%)  | 5,491 (31.4%)  | 0.18 |
| Baseline Medication Use, n(%)                     |                |                |       |                |                |      |
| Antiarrhythmic                                    | 2,955 (11.5%)  | 1,905 (10.9%)  | 2.07  | 2,881 (11.3%)  | 1,964 (11.2%)  | 0.09 |
| Statins                                           | 11,332 (44.3%) | 7,562 (43.2%)  | 2.08  | 11,268 (44.0%) | 7,728 (44.2%)  | 0.33 |
| Anti-platelets                                    | 2,084 (8.1%)   | 1,452 (8.3%)   | 0.58  | 2,110 (8.2%)   | 1,441 (8.2%)   | 0.02 |
| Aromatase Inhibitors                              | 51 (0.2%)      | 36 (0.2%)      | 0.15  | 52 (0.2%)      | 34 (0.2%)      | 0.19 |
| Beta Blockers                                     | 10,283 (40.2%) | 6,555 (37.5%)  | 5.53  | 10,026 (39.2%) | 6,874 (39.3%)  | 0.27 |
| Gastroprotective Agents                           | 8,402 (32.8%)  | 5,514 (31.5%)  | 2.78  | 8,278 (32.3%)  | 5,666 (32.4%)  | 0.12 |
| SERMS                                             | 99 (0.4%)      | 83 (0.5%)      | 1.34  | 110 (0.4%)     | 75 (0.4%)      | 0.02 |
| NSAIDs                                            | 8,035 (31.4%)  | 5,990 (34.2%)  | 6.09  | 8,311 (32.5%)  | 5,671 (32.4%)  | 0.09 |
| Hormone Therapy (estrogen)                        | 1,225 (4.8%)   | 1,045 (6.0%)   | 5.27  | 1,331 (5.2%)   | 903 (5.2%)     | 0.15 |

DVT: Deep vein thrombosis; ESRD: End stage renal disease; IPTW: Inverse probability treatment weighting; NSAIDs: Nonsteroidal anti-inflammatory drug; SERMS: Selective estrogen receptor modulator; PE: Pulmonary embolism; SD: Standard deviation; STD: Standardized differences; VTE: Venous thromboembolism

<sup>a</sup> Std Difference=100\*|actual std diff|. Std Difference greater than 10 is considered significant

<sup>b</sup> After applying weights, the values for age category were not whole numbers; therefore, due to rounding the sum of patients does not equal 100%

<sup>c</sup> After applying weights, the values for region category were not whole numbers; therefore, due to rounding the sum of patients does not equal 100%

Note: the following variables were considered in the propensity score model and subsequent weighting: age category, gender, geographic region, type of index encounter (inpatient vs outpatient), VTE diagnosis (DVT vs PE with or without DVT), VTE etiology (provoked vs unprovoked), Deyo Charlson comorbidity index, baseline comorbidities (all listed tabs), recent history of falls, fracture/trauma involving lower extremities, selected surgeries, and baseline medication use (weighted for specific medications).

**Supplemental Table 3. Pre and post IPTW Descriptive Baseline Characteristics among VTE patients with morbid obesity who initiated apixaban vs warfarin**

|                                      | Pre-IPTW                    |                 |                  | Post-IPTW                   |                 |                  |
|--------------------------------------|-----------------------------|-----------------|------------------|-----------------------------|-----------------|------------------|
|                                      | Warfarin Cohort (Reference) | Apixaban Cohort | STD <sup>a</sup> | Warfarin Cohort (Reference) | Apixaban Cohort | STD <sup>a</sup> |
| Sample Size                          | 12,340                      | 7,411           |                  | 12,340                      | 7,411           |                  |
| Age, Mean (SD)                       | 62.4 (13.9)                 | 61.7 (14.0)     | 4.60             | 62.1 (14.0)                 | 62.3 (13.9)     | 1.81             |
| Age Categories, <sup>b</sup> n(%)    |                             |                 |                  |                             |                 |                  |
| 18-54                                | 3,356 (27.2%)               | 2,154 (29.1%)   | 4.16             | 3,438 (27.9%)               | 2,051 (27.7%)   | 0.41             |
| 55-64                                | 2,325 (18.8%)               | 1,612 (21.8%)   | 7.24             | 2,453 (19.9%)               | 1,467 (19.8%)   | 0.22             |
| 65-74                                | 4,481 (36.3%)               | 2,389 (32.2%)   | 8.60             | 4,297 (34.8%)               | 2,590 (35.0%)   | 0.28             |
| 75-79                                | 1,250 (10.1%)               | 698 (9.4%)      | 2.40             | 1,221 (9.9%)                | 738 (10.0%)     | 0.21             |
| ≥80                                  | 928 (7.5%)                  | 558 (7.5%)      | 0.03             | 932 (7.6%)                  | 565 (7.6%)      | 0.28             |
| Gender, n(%)                         |                             |                 |                  |                             |                 |                  |
| Male                                 | 4,408 (35.7%)               | 2,811 (37.9%)   | 4.58             | 4,511 (36.6%)               | 2,702 (36.5%)   | 0.19             |
| Female                               | 7,932 (64.3%)               | 4,600 (62.1%)   | 4.58             | 7,829 (63.4%)               | 4,709 (63.5%)   | 0.19             |
| Geographic Region, <sup>c</sup> n(%) |                             |                 |                  |                             |                 |                  |
| Northeast                            | 1,835 (14.9%)               | 988 (13.3%)     | 4.42             | 1,761 (14.3%)               | 1,050 (14.2%)   | 0.28             |
| North Central                        | 4,050 (32.8%)               | 1,661 (22.4%)   | 23.44            | 3,568 (28.9%)               | 2,139 (28.9%)   | 0.13             |
| South                                | 4,226 (34.2%)               | 3,931 (53.0%)   | 38.60            | 5,095 (41.3%)               | 3,058 (41.3%)   | 0.06             |
| West                                 | 2,210 (17.9%)               | 823 (11.1%)     | 19.41            | 1,899 (15.4%)               | 1,154 (15.6%)   | 0.51             |
| Other                                | 19 (0.2%)                   | 8 (0.1%)        | 1.27             | 17 (0.1%)                   | 10 (0.1%)       | 0.05             |
| Index VTE Setting, n(%)              |                             |                 |                  |                             |                 |                  |
| Inpatient                            | 8,691 (70.4%)               | 4,963 (67.0%)   | 7.47             | 8,544 (69.2%)               | 5,146 (69.4%)   | 0.44             |
| Outpatient                           | 3,649 (29.6%)               | 2,448 (33.0%)   | 7.47             | 3,796 (30.8%)               | 2,265 (30.6%)   | 0.44             |

|                                                   |                |               |       |                |               |      |  |
|---------------------------------------------------|----------------|---------------|-------|----------------|---------------|------|--|
| Index VTE Event Type, n(%)                        |                |               |       |                |               |      |  |
| DVT only                                          | 5,242 (42.5%)  | 3,216 (43.4%) | 1.85  | 5,294 (42.9%)  | 3,183 (43.0%) | 0.10 |  |
| PE with or without DVT                            | 7,098 (57.5%)  | 4,195 (56.6%) | 1.85  | 7,046 (57.1%)  | 4,228 (57.0%) | 0.10 |  |
| Index VTE Etiology, n(%)                          |                |               |       |                |               |      |  |
| Provoked                                          | 8,305 (67.3%)  | 4,673 (63.1%) | 8.92  | 8,108 (65.7%)  | 4,875 (65.8%) | 0.14 |  |
| Unprovoked                                        | 4,035 (32.7%)  | 2,738 (36.9%) | 8.92  | 4,232 (34.3%)  | 2,536 (34.2%) | 0.14 |  |
| Deyo-Charlson Comorbidity Index, Mean (SD)        | 2.9 (2.6)      | 2.8 (2.6)     | 3.73  | 2.9 (2.6)      | 2.9 (2.6)     | 0.45 |  |
| Baseline Comorbidity, n(%)                        |                |               |       |                |               |      |  |
| Alcohol abuse                                     | 269 (2.2%)     | 161 (2.2%)    | 0.05  | 272 (2.2%)     | 169 (2.3%)    | 0.49 |  |
| Anemia                                            | 4,253 (34.5%)  | 2,253 (30.4%) | 8.69  | 4,062 (32.9%)  | 2,440 (32.9%) | 0.03 |  |
| Central venous Catheter                           | 1,677 (13.6%)  | 816 (11.0%)   | 7.86  | 1,561 (12.7%)  | 939 (12.7%)   | 0.03 |  |
| Hematologic disorders associated with bleeding    | 1,165 (9.4%)   | 545 (7.4%)    | 7.53  | 1,068 (8.7%)   | 643 (8.7%)    | 0.06 |  |
| Ischemic heart/ coronary artery disease           | 3,557 (28.8%)  | 2,148 (29.0%) | 0.35  | 3,576 (29.0%)  | 2,157 (29.1%) | 0.26 |  |
| Dyspepsia or stomach discomfort                   | 3,086 (25.0%)  | 1,846 (24.9%) | 0.23  | 3,090 (25.0%)  | 1,869 (25.2%) | 0.40 |  |
| Hyperlipidemia                                    | 6,773 (54.9%)  | 4,182 (56.4%) | 3.11  | 6,854 (55.5%)  | 4,122 (55.6%) | 0.15 |  |
| Pneumonia                                         | 2,011 (16.3%)  | 1,257 (17.0%) | 1.79  | 2,043 (16.6%)  | 1,225 (16.5%) | 0.10 |  |
| Rheumatologic disease                             | 604 (4.9%)     | 364 (4.9%)    | 0.08  | 606 (4.9%)     | 366 (4.9%)    | 0.11 |  |
| Sleep apnea                                       | 4,715 (38.2%)  | 2,761 (37.3%) | 1.97  | 4,674 (37.9%)  | 2,804 (37.8%) | 0.09 |  |
| Spinal cord injury                                | 27 (0.2%)      | 21 (0.3%)     | 1.29  | 30 (0.2%)      | 18 (0.2%)     | 0.14 |  |
| Thrombophilia                                     | 554 (4.5%)     | 294 (4.0%)    | 2.60  | 532 (4.3%)     | 326 (4.4%)    | 0.41 |  |
| Varicose Veins                                    | 675 (5.5%)     | 457 (6.2%)    | 2.98  | 707 (5.7%)     | 427 (5.8%)    | 0.11 |  |
| Hypertension                                      | 10,233 (82.9%) | 6,131 (82.7%) | 0.52  | 10,235 (82.9%) | 6,155 (83.1%) | 0.31 |  |
| Non-ESRD Renal Disease                            | 2,431 (19.7%)  | 1,415 (19.1%) | 1.53  | 2,416 (19.6%)  | 1,463 (19.7%) | 0.41 |  |
| End Stage Renal Disease                           | 409 (3.3%)     | 132 (1.8%)    | 9.74  | 339 (2.7%)     | 207 (2.8%)    | 0.26 |  |
| Inflammatory Bowel Disease                        | 176 (1.4%)     | 101 (1.4%)    | 0.54  | 173 (1.4%)     | 102 (1.4%)    | 0.21 |  |
| Baseline bleed                                    | 2,961 (24.0%)  | 1,460 (19.7%) | 10.41 | 2,767 (22.4%)  | 1,665 (22.5%) | 0.10 |  |
| Recent History of Falls, n(%)                     | 741 (6.0%)     | 436 (5.9%)    | 0.51  | 737 (6.0%)     | 443 (6.0%)    | 0.05 |  |
| Fracture/trauma involving Lower Extremities, n(%) | 1,800 (14.6%)  | 1,126 (15.2%) | 1.70  | 1,824 (14.8%)  | 1,092 (14.7%) | 0.13 |  |
| Selected Surgeries, n(%)                          | 3,912 (31.7%)  | 2,292 (30.9%) | 1.67  | 3,888 (31.5%)  | 2,332 (31.5%) | 0.08 |  |
| Baseline Medication Use, n(%)                     |                |               |       |                |               |      |  |
| Antiarrhythmic                                    | 1,453 (11.8%)  | 862 (11.6%)   | 0.45  | 1,446 (11.7%)  | 868 (11.7%)   | 0.04 |  |
| Statins                                           | 5,277 (42.8%)  | 3,188 (43.0%) | 0.51  | 5,306 (43.0%)  | 3,205 (43.2%) | 0.50 |  |

|                            |               |               |      |               |               |      |
|----------------------------|---------------|---------------|------|---------------|---------------|------|
| Anti-platelets             | 895 (7.3%)    | 568 (7.7%)    | 1.57 | 917 (7.4%)    | 548 (7.4%)    | 0.15 |
| Aromatase Inhibitors       | 25 (0.2%)     | 17 (0.2%)     | 0.58 | 27 (0.2%)     | 16 (0.2%)     | 0.12 |
| Beta Blockers              | 5,001 (40.5%) | 2,985 (40.3%) | 0.51 | 4,993 (40.5%) | 3,006 (40.6%) | 0.22 |
| Gastroprotective Agents    | 4,022 (32.6%) | 2,388 (32.2%) | 0.79 | 4,009 (32.5%) | 2,408 (32.5%) | 0.02 |
| SERMS                      | 37 (0.3%)     | 27 (0.4%)     | 1.12 | 41 (0.3%)     | 25 (0.3%)     | 0.18 |
| NSAIDs                     | 3,983 (32.3%) | 2,682 (36.2%) | 8.25 | 4,156 (33.7%) | 2,490 (33.6%) | 0.16 |
| Hormone Therapy (estrogen) | 610 (4.9%)    | 446 (6.0%)    | 4.72 | 651 (5.3%)    | 385 (5.2%)    | 0.36 |

DVT: Deep vein thrombosis; ESRD: End stage renal disease; IPTW: Inverse probability treatment weighting; NSAIDs: Nonsteroidal anti-inflammatory drug; SERMS: Selective estrogen receptor modulator; PE: Pulmonary embolism; SD: Standard deviation; STD: Standardized differences; VTE: Venous thromboembolism

<sup>a</sup>Std Difference=100\*|actual std diff|. Std Difference greater than 10 is considered significant.

<sup>b</sup> After applying weights, the values for age category were not whole numbers; therefore, due to rounding the sum of patients does not equal 100%

<sup>c</sup> After applying weights, the values for region category were not whole numbers; therefore, due to rounding the sum of patients does not equal 100%

**Supplemental Table 4. Post IPTW Incidence Rate of Recurrent VTE, Major Bleeding, and CRNM Bleeding among Obese and Morbid Obese VTE Patients who initiated Apixaban vs Warfarin**

|                              |                                              | Warfarin Cohort<br>(Reference) | Apixaban Cohort   |
|------------------------------|----------------------------------------------|--------------------------------|-------------------|
| <b>Obese Patients</b>        |                                              |                                |                   |
| Sample Size                  |                                              | 25,602                         | 17,493            |
| Recurrent VTE                |                                              | 638 (2.5%)                     | 317 (1.8%)        |
|                              | Incidence rate per 100 person-years (95% CI) | 7.3 (6.8,7.9)                  | 5.6 (5.0,6.2)     |
|                              | Number of person-years                       | 8,735.4                        | 5,688.5           |
| Major Bleeding               |                                              | 546 (2.1%)                     | 265 (1.5%)        |
|                              | Incidence rate per 100 person-years (95% CI) | 6.2 (5.7,6.8)                  | 4.6 (4.1,5.2)     |
|                              | Number of person-years                       | 8,762.4                        | 5,706.6           |
| CRNM Bleeding                |                                              | 2,843 (11.1%)                  | 1,579 (9.0%)      |
|                              | Incidence rate per 100 person-years (95% CI) | 34.8 (33.5,36.1)               | 29.2 (27.8, 30.7) |
|                              | Number of person-years                       | 8,181.5                        | 5,397.7           |
| <b>Morbid Obese Patients</b> |                                              |                                |                   |
| Sample Size                  |                                              | 12,340                         | 7,411             |
| Recurrent VTE                |                                              | 337 (2.7%)                     | 130 (1.8%)        |
|                              | Incidence rate per 100 person-years (95% CI) | 8.0 (7.2,8.9)                  | 5.4 (4.5,6.4)     |
|                              | Number of person-years                       | 4,212.2                        | 2,412.9           |
| Major Bleeding               |                                              | 268 (2.2%)                     | 107 (1.4%)        |
|                              | Incidence rate per 100 person-years (95% CI) | 6.3 (5.6,7.2)                  | 4.4 (3.6,5.33)    |
|                              | Number of person-years                       | 4,230.8                        | 2,418.8           |
| CRNM Bleeding                |                                              | 1,495 (12.1%)                  | 672 (9.1%)        |
|                              | Incidence rate per 100 person-years (95% CI) | 38.2 (36.3,40.1)               | 29.3 (27.2,31.6)  |
|                              | Number of person-years                       | 3,919.5                        | 2,290.4           |

CI: Confidence Interval; CRNM: Clinically Relevant Non-Major (Bleeding); VTE: Venous Thromboembolism
